# Supplementary material for: Timing of Meals and Sleep in the Mediterranean Population: The Effect of Taste, Genetics, Environmental Determinants, and Interactions on Obesity Phenotypes
Source: MDPI journal article supplement (doi:10.3390/nu15030708), 2023-01-30
Supplement: s1 [file s1]

## SUPPLEMENTARY MATERIAL

### Timing of meals and sleep in a Mediterranean population: Taste, genetics, environmental determinants and interactions on obesity phenotypes

Barragán R, Fernández-Carrión R, Asensio-Márquez E.M, Ortega-Azorín C, Alvarez-Sala A, Pérez-Fidalgo A, Sorlí J.V, Portolés O, Gonzalez-Monje I, St-Onge M-P, Corella D

**Table S1: Association between the measured taste perception and eating/sleeping pattern taking into account the days of the week (weekdays or weekend)**

| <b>Taste</b>                         | <b>Eating/Sleeping pattern</b> | <b><math>\beta \pm \text{SE}</math></b> | <b>P<sup>1</sup></b> |
|--------------------------------------|--------------------------------|-----------------------------------------|----------------------|
| <b><i>Bitter</i></b><br><b>(PTC)</b> | Eating midpoint weekdays       | -0.07 $\pm$ 0.02                        | 0.001                |
|                                      | Eating midpoint weekend        | -0.05 $\pm$ 0.03                        | 0.042                |
|                                      | Breakfast time weekdays        | -0.08 $\pm$ 0.04                        | 0.021                |
|                                      | Breakfast time weekend         | -0.04 $\pm$ 0.04                        | 0.338                |
|                                      | Dinner time weekdays           | 0.06 $\pm$ 0.02                         | 0.013                |
|                                      | Dinner time weekend            | -0.04 $\pm$ 0.02                        | 0.046                |
|                                      | Wake time weekdays             | -0.09 $\pm$ 0.03                        | 0.005                |
|                                      | Wake time weekend              | -0.10 $\pm$ 0.04                        | 0.005                |
|                                      | Midpoint of sleep weekdays     | -0.10 $\pm$ 0.03                        | 0.001                |
|                                      | Midpoint of sleep weekend      | -0.08 $\pm$ 0.04                        | 0.043                |
| <b><i>Sweet</i></b>                  | Eating midpoint weekdays       | 0.04 $\pm$ 0.03                         | 0.190                |
|                                      | Eating midpoint weekend        | 0.12 $\pm$ 0.04                         | 0.002                |
|                                      | Breakfast time weekdays        | 0.09 $\pm$ 0.05                         | 0.098                |
|                                      | Breakfast time weekend         | 0.20 $\pm$ 0.05                         | <0.001               |
| <b><i>Sour</i></b>                   | Breakfast time weekdays        | 0.03 $\pm$ 0.04                         | 0.444                |
|                                      | Breakfast time weekend         | 0.08 $\pm$ 0.04                         | 0.066                |
| <b><i>Umami</i></b>                  | Breakfast time weekdays        | 0.06 $\pm$ 0.04                         | 0.139                |
|                                      | Breakfast time weekend         | 0.05 $\pm$ 0.04                         | 0.224                |

Results of multivariable linear regressions. P1: Unadjusted P value; P2 Adjusted P value for sex and age (additive model). PTC: phenylthiocarbamide; MedDiet: Mediterranean Diet.

**Figure S1. Association between adherence to Mediterranean Diet and total sleep duration.**

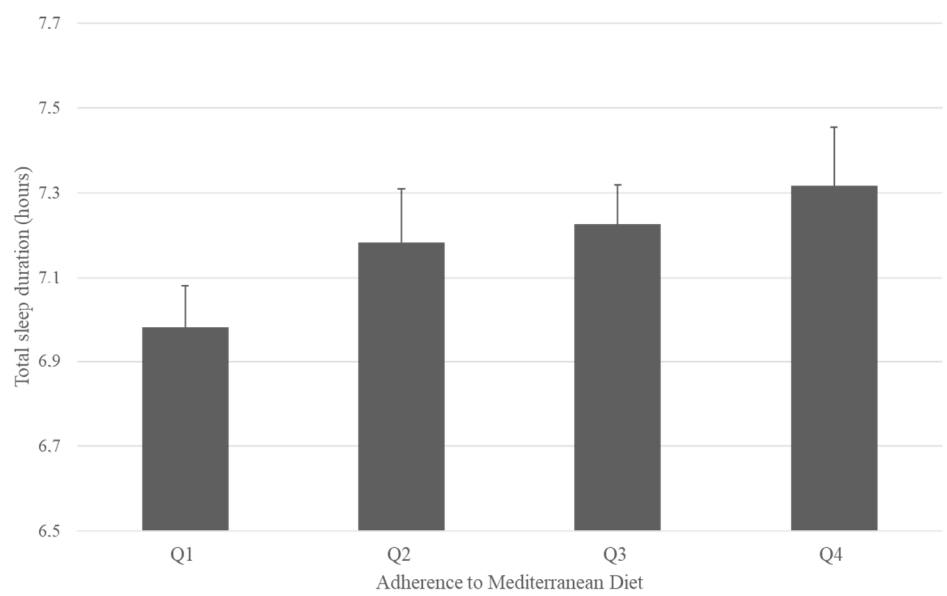

*Q: quartile. Q1 was for a score between 3 to 6; Q2 for a score of 8; Q3 for a score of 9-10; and Q4 for a score  $\geq 11$  ( $P=0.010$ )*

**Table S2. Prevalence of the genotypes of the SNPs studied.**

| Gene           | SNP       | Genotype | Population (%) | Allele frequency   |
|----------------|-----------|----------|----------------|--------------------|
| <b>TAS2R38</b> | rs713598  | GG       | 29.8           | G=0.562<br>C=0.438 |
|                |           | GC       | 52.8           |                    |
|                |           | CC       | 17.4           |                    |
| <b>FTO</b>     | rs9939609 | TT       | 37.4           | T=0.592<br>A=0.408 |
|                |           | TA       | 43.7           |                    |
|                |           | AA       | 18.9           |                    |
| <b>CLOCK</b>   | rs4580704 | CC       | 39.3           | C=0.618<br>G=0.382 |
|                |           | CG       | 46.9           |                    |
|                |           | GG       | 13.9           |                    |

A: adenine; C: cytosine; G: guanine; T: thymine.

**Table S3: Association between the selected polymorphism and eating/sleeping pattern taking into account the days of the week (weekdays or weekend)**

| Gene                         | Eating/Sleeping pattern    | $\beta \pm SE$    | P <sup>1</sup> |
|------------------------------|----------------------------|-------------------|----------------|
| <b>TAS2R38-<br/>rs713598</b> | Eating midpoint weekdays   | -0.13 $\pm$ 0.05  | 0.015          |
|                              | Eating midpoint weekend    | -0.13 $\pm$ 0.07  | 0.039          |
|                              | Breakfast time weekdays    | -0.20 $\pm$ 0.08  | 0.020          |
|                              | Breakfast time weekend     | -0.07 $\pm$ 0.09  | 0.472          |
|                              | Wake time weekdays         | -0.16 $\pm$ 0.07  | 0.030          |
|                              | Wake time weekend          | -0.10 $\pm$ 0.09  | 0.225          |
|                              | Midpoint of sleep weekdays | -0.12 $\pm$ 0.07  | 0.028          |
|                              | Midpoint of sleep weekend  | -0.20 $\pm$ 0.08  | 0.017          |
| <b>FTO-<br/>rs9939609</b>    | Lunch time weekdays        | -0.12 $\pm$ 0.06  | 0.040          |
|                              | Lunch time weekend         | -0.06 $\pm$ 0.04  | 0.163          |
|                              | Afternoon teatime weekdays | -0.12 $\pm$ .0.06 | 0.056          |
|                              | Afternoon teatime weekend  | -0.04 $\pm$ 0.07  | 0.561          |
|                              | Wake time weekdays         | 0.16 $\pm$ 0.07   | 0.020          |
|                              | Wake time weekend          | 0.05 $\pm$ 0.08   | 0.510          |
|                              | Midpoint of sleep weekdays | 0.16 $\pm$ 0.06   | 0.012          |
|                              | Midpoint of sleep weekend  | 0.06 $\pm$ 0.08   | 0.469          |

Results of multivariable linear regressions. P1: Unadjusted P value; P2 Adjusted P value for sex and age (additive model). PTC: phenylthiocarbamide; MedDiet: Mediterranean Diet.

**Table S4. Means, standard deviations and p-values of body mass index (BMI) and waist circumference according to the indicated genotypes.**

| Genotype  | BMI (kg/m <sup>2</sup> ) |         | Waist circumference (cm) |         |
|-----------|--------------------------|---------|--------------------------|---------|
| rs713598  |                          |         |                          |         |
| GG        | 27.0±5.4                 | P=0.040 | 90.9±15.7                | P=0.071 |
| GC        | 28.1±4.8                 |         | 92.8±13.5                |         |
| CC        | 27.9±5.2                 |         | 96.3±18.6                |         |
| rs9939609 |                          |         |                          |         |
| TT        | 27.5±5.0                 | P=0.283 | 92.3±15.8                | P=0.766 |
| TA        | 28.0±5.1                 |         | 92.6±14.5                |         |
| AA        | 28.6±5.6                 |         | 93.9±15.5                |         |
| rs4580704 |                          |         |                          |         |
| CC        | 28.6±5.1                 | P=0.033 | 94.7±14.8                | P=0.117 |
| CG        | 27.6±5.4                 |         | 91.6±15.6                |         |
| GG        | 26.5±4.7                 |         | 90.8±14.7                |         |

Values are mean ± SE. P values were obtained by ANOVA analysis (unadjusted). BMI: Body Mass Index.
